# Supplementary material for: Relationship of Corpus Callosum Integrity with Working Memory, Planning, and Speed of Processing in Patients with First-Episode and Chronic Schizophrenia
Source: MDPI journal article supplement (doi:10.3390/jcm10143158), 2021-07-17
Supplement: s1 [file s1]

**Supplementary Table S1.** Demographic and clinical characteristics of all participants.

GAF = Global Assessment of Functioning; PANSS = Positive and Negative Syndrome Scale.

<sup>a</sup> One-way analysis of variance *F* test. <sup>b</sup> Chi-squared test. <sup>c</sup> Student's *t* test.

\* After Holm-Bonferroni *p*-value correction for multiple comparisons.

**Supplementary Table S2.** Relationship between DTI measures of the corpus callosum (CC) and cognitive functions in all participants (Pearson's  $r$  correlation coefficient).

| Variable                                           | Fractional anisotropy (FA) |          |          |          |          |          |          |          |          |          | Mean diffusivity (MD) |          |          |          |          |          |          |          |          |          |
|----------------------------------------------------|----------------------------|----------|----------|----------|----------|----------|----------|----------|----------|----------|-----------------------|----------|----------|----------|----------|----------|----------|----------|----------|----------|
|                                                    | Region 1                   |          | Region 2 |          | Region 3 |          | Region 4 |          | Region 5 |          | Region 1              |          | Region 2 |          | Region 3 |          | Region 4 |          | Region 5 |          |
|                                                    | <i>r</i>                   | <i>p</i> | <i>r</i> | <i>p</i> | <i>r</i> | <i>p</i> | <i>r</i> | <i>p</i> | <i>r</i> | <i>p</i> | <i>r</i>              | <i>p</i> | <i>r</i> | <i>p</i> | <i>r</i> | <i>p</i> | <i>r</i> | <i>p</i> | <i>r</i> | <i>p</i> |
| Patients with first-episode schizophrenia (FES)    |                            |          |          |          |          |          |          |          |          |          |                       |          |          |          |          |          |          |          |          |          |
| (n = 18)                                           |                            |          |          |          |          |          |          |          |          |          |                       |          |          |          |          |          |          |          |          |          |
| WMS-SSSF: visuospatial short-term memory           | 0.06                       | 0.816    | 0.14     | 0.591    | 0.41     | 0.087    | 0.01     | 0.954    | -0.03    | 0.915    | -0.14                 | 0.592    | 0.08     | 0.752    | -0.21    | 0.393    | -0.08    | 0.765    | -0.03    | 0.905    |
| WMS-SSSB: visuospatial working memory              | 0.15                       | 0.547    | 0.18     | 0.465    | 0.20     | 0.433    | -0.01    | 0.975    | 0.05     | 0.838    | 0.23                  | 0.363    | 0.36     | 0.140    | 0.17     | 0.504    | 0.42     | 0.084    | 0.37     | 0.133    |
| LNST: verbal working memory                        | -0.10                      | 0.689    | -0.17    | 0.511    | -0.13    | 0.605    | 0.11     | 0.662    | -0.29    | 0.240    | -0.22                 | 0.376    | -0.13    | 0.602    | 0.24     | 0.348    | 0.03     | 0.916    | 0.15     | 0.553    |
| NABMS: planning independent on speed of processing | 0.08                       | 0.738    | 0.19     | 0.455    | -0.06    | 0.825    | 0.06     | 0.823    | -0.03    | 0.906    | -0.15                 | 0.544    | -0.15    | 0.549    | -0.14    | 0.568    | -0.45    | 0.061    | -0.24    | 0.344    |
| NABMSP: planning dependent on speed of processing  | 0.27                       | 0.273    | 0.40     | 0.103    | 0.20     | 0.423    | 0.10     | 0.707    | 0.04     | 0.874    | -0.28                 | 0.265    | -0.35    | 0.155    | -0.38    | 0.115    | -0.53    | 0.023    | -0.27    | 0.274    |
| BACSSCS: speed of visual processing                | -0.31                      | 0.217    | -0.29    | 0.245    | -0.23    | 0.359    | -0.30    | 0.224    | -0.58    | 0.012    | -0.13                 | 0.611    | 0.09     | 0.711    | 0.15     | 0.550    | 0.05     | 0.852    | 0.19     | 0.441    |
| Patients with chronic schizophrenia (CS)           |                            |          |          |          |          |          |          |          |          |          |                       |          |          |          |          |          |          |          |          |          |

|                                                    | (n = 55)                          |       |       |       |       |       |       |       |       |       |       |       |       |       |        |       |       |       |       |       |
|----------------------------------------------------|-----------------------------------|-------|-------|-------|-------|-------|-------|-------|-------|-------|-------|-------|-------|-------|--------|-------|-------|-------|-------|-------|
| WMS-SSSF: visuospatial short-term memory           | 0.17                              | 0.205 | 0.15  | 0.260 | 0.14  | 0.309 | 0.19  | 0.171 | 0.22  | 0.111 | -0.19 | 0.173 | -0.11 | 0.417 | -0.16  | 0.241 | -0.12 | 0.391 | -0.10 | 0.477 |
| WMS-SSSB: visuospatial working memory              | 0.05                              | 0.704 | 0.11  | 0.426 | 0.06  | 0.688 | 0.07  | 0.624 | 0.13  | 0.355 | -0.09 | 0.521 | -0.03 | 0.806 | -0.04  | 0.749 | 0.02  | 0.912 | -0.11 | 0.411 |
| LNST: verbal working memory                        | 0.08                              | 0.542 | 0.1   | 0.456 | 0.23  | 0.095 | 0.03  | 0.820 | 0.10  | 0.456 | -0.21 | 0.131 | -0.20 | 0.141 | -0.34* | 0.010 | -0.14 | 0.294 | -0.12 | 0.371 |
| NABMS: planning independent on speed of processing | 0.08                              | 0.577 | 0.11  | 0.414 | 0.19  | 0.173 | 0.09  | 0.508 | 0.07  | 0.62  | -0.14 | 0.318 | -0.11 | 0.415 | -0.17  | 0.221 | -0.10 | 0.456 | -0.04 | 0.744 |
| NABMSP: planning dependent on speed of processing  | 0.07                              | 0.607 | 0.09  | 0.504 | 0.15  | 0.271 | 0.04  | 0.749 | 0.05  | 0.712 | -0.12 | 0.369 | -0.07 | 0.591 | -0.16  | 0.244 | -0.19 | 0.160 | -0.09 | 0.507 |
| BACSSCS: speed of visual processing                | -0.01                             | 0.926 | -0.06 | 0.650 | 0.11  | 0.441 | 0.00  | 0.987 | 0.20  | 0.145 | -0.19 | 0.162 | -0.07 | 0.607 | -0.19  | 0.170 | -0.17 | 0.208 | -0.17 | 0.213 |
|                                                    | Healthy controls (HC)<br>(n = 30) |       |       |       |       |       |       |       |       |       |       |       |       |       |        |       |       |       |       |       |
| WMS-SSSF: visuospatial short-term memory           | 0.28                              | 0.137 | 0.34  | 0.064 | 0.06  | 0.770 | 0.15  | 0.441 | 0.20  | 0.300 | 0.17  | 0.365 | -0.05 | 0.808 | 0.07   | 0.721 | 0.08  | 0.679 | 0.14  | 0.471 |
| WMS-SSSB: visuospatial working memory              | 0.12                              | 0.518 | 0.03  | 0.875 | 0.07  | 0.723 | 0.16  | 0.400 | 0.43  | 0.019 | 0.09  | 0.626 | 0.11  | 0.562 | 0.04   | 0.854 | -0.04 | 0.848 | -0.14 | 0.475 |
| LNST: verbal working memory                        | 0.14                              | 0.468 | 0.32  | 0.084 | 0.05  | 0.808 | 0.11  | 0.550 | -0.09 | 0.632 | -0.02 | 0.929 | -0.16 | 0.393 | -0.03  | 0.887 | 0.09  | 0.638 | 0.08  | 0.678 |
| NABMS: planning independent on speed of processing | 0.00                              | 0.994 | 0.11  | 0.560 | 0.09  | 0.647 | 0.24  | 0.194 | 0.13  | 0.495 | 0.10  | 0.602 | -0.03 | 0.862 | -0.20  | 0.286 | -0.09 | 0.643 | 0.25  | 0.176 |
| NABMSP: planning dependent on speed of processing  | 0.33                              | 0.074 | 0.53* | 0.003 | -0.01 | 0.954 | 0.23  | 0.222 | -0.08 | 0.663 | 0.02  | 0.920 | -0.32 | 0.081 | -0.20  | 0.297 | 0.00  | 0.996 | 0.31  | 0.092 |
| BACSSCS: speed of visual processing                | 0.05                              | 0.773 | -0.06 | 0.736 | 0.09  | 0.629 | -0.16 | 0.410 | 0.24  | 0.200 | 0.28  | 0.132 | 0.20  | 0.283 | 0.13   | 0.481 | 0.17  | 0.372 | -0.09 | 0.646 |

\*  $p < 0.05$  (after Holm-Bonferroni  $p$ -value correction for multiple correlations).
